# Supplementary material for: Understanding the general feature of microvariability in Kepler blazar W2R 1926+42
Source: Oxford University Press journal article supplement (doi:10.1093/pasj/psw119), 2016-11-19
Supplement: pasj_69_1_15_s13.zip [file pasj_69_1_15_s13.zip]

---

# Understanding the General Feature of Microvariability in *Kepler* Blazar W2R 1926+42

Mahito SASADA<sup>1,2</sup>, Shin MINESHIGE<sup>2</sup>, Shinya YAMADA<sup>3</sup> and Hitoshi  
NEGORO<sup>4</sup>

<sup>1</sup>Institute for Astrophysical Research, Boston University, 725 Commonwealth Avenue, Boston,  
MA 02215, USA

<sup>2</sup>Department of Astronomy, Graduate School of Science, Kyoto University,  
Kitashirakawa-Oiwake-cho, Sakyo-ku, Kyoto 606-8502, Japan

<sup>3</sup>Department of Physics, Tokyo Metropolitan University, Minami-Osawa 1-1 Hachioji, Tokyo  
192-0397, Japan

<sup>4</sup>Department of Physics, Nihon University, 1-8 Kanda-Surugadai, Chiyoda-ku, Tokyo  
101-8308, Japan

\*E-mail: sasada@bu.edu

Received ; Accepted

## Abstract

This file contains supplement tables and figures.

**Key words:** galaxies: active - galaxies: jets - galaxies: individual (W2R 1926+42) - techniques: photo-  
metric - methods: observational

---

Supplement table 1. Amplitude and E-folding Timescales of Shots

| No | Date    | Amplitude | Duration    | Rise Time   | Decay Time  |
|----|---------|-----------|-------------|-------------|-------------|
| 1  | 8.0924  | 152±17    | 0.042±0.006 | 0.018±0.005 | 0.024±0.001 |
| 2  | 8.4207  | 82±17     | 0.096±0.035 | 0.057±0.017 | 0.039±0.018 |
| 3  | 8.8232  | 71±14     | 0.090±0.035 | 0.042±0.016 | 0.048±0.020 |
| 4  | 9.6917  | 69±14     | 0.068±0.034 | 0.039±0.019 | 0.029±0.015 |
| 5  | 9.9423  | 110±14    | 0.129±0.031 | 0.108±0.025 | 0.020±0.005 |
| 6  | 10.5070 | 96±20     | 0.110±0.039 | 0.040±0.019 | 0.069±0.020 |
| 7  | 11.0410 | 90±12     | 0.066±0.012 | 0.043±0.009 | 0.022±0.003 |
| 8  | 11.0976 | 92±12     | 0.060±0.010 | 0.016±0.004 | 0.043±0.005 |
| 9  | 12.6751 | 96±12     | 0.125±0.029 | 0.087±0.020 | 0.038±0.009 |
| 10 | 13.7452 | 78±13     | 0.052±0.016 | 0.008±0.002 | 0.044±0.014 |
| 11 | 13.8821 | 79±13     | 0.078±0.022 | 0.034±0.008 | 0.044±0.014 |
| 12 | 14.2036 | 118±13    | 0.182±0.025 | 0.077±0.011 | 0.105±0.014 |
| 13 | 14.5496 | 123±12    | 0.109±0.013 | 0.073±0.012 | 0.036±0.001 |
| 14 | 14.6940 | 120±12    | 0.160±0.012 | 0.082±0.004 | 0.078±0.008 |
| 15 | 15.2260 | 115±13    | 0.143±0.018 | 0.109±0.010 | 0.034±0.007 |
| 16 | 16.5085 | 69±14     | 0.120±0.040 | 0.054±0.020 | 0.066±0.020 |
| 17 | 17.1182 | 98±14     | 0.171±0.042 | 0.085±0.022 | 0.086±0.019 |
| 18 | 17.6801 | 245±25    | 0.249±0.018 | 0.149±0.006 | 0.100±0.012 |
| 19 | 17.9444 | 179±25    | 0.225±0.019 | 0.111±0.006 | 0.114±0.013 |
| 20 | 18.5908 | 145±17    | 0.143±0.017 | 0.060±0.005 | 0.083±0.013 |
| 21 | 19.2072 | 136±16    | 0.121±0.009 | 0.058±0.003 | 0.063±0.007 |
| 22 | 19.9265 | 101±16    | 0.093±0.028 | 0.043±0.008 | 0.050±0.020 |
| 23 | 20.3325 | 74±13     | 0.064±0.017 | 0.042±0.008 | 0.021±0.009 |
| 24 | 21.0640 | 118±13    | 0.123±0.040 | 0.046±0.005 | 0.077±0.035 |
| 25 | 21.8950 | 94±14     | 0.066±0.010 | 0.046±0.008 | 0.020±0.002 |
| 26 | 21.9277 | 93±14     | 0.034±0.014 | 0.003±0.002 | 0.032±0.012 |
| 27 | 22.0333 | 216±13    | 0.098±0.004 | 0.049±0.001 | 0.049±0.003 |
| 28 | 22.0905 | 229±13    | 0.138±0.006 | 0.042±0.002 | 0.096±0.003 |
| 29 | 29.1416 | 80±13     | 0.123±0.022 | 0.068±0.012 | 0.054±0.010 |
| 30 | 29.4686 | 181±17    | 0.293±0.025 | 0.203±0.016 | 0.090±0.009 |
| 31 | 29.7492 | 197±16    | 0.285±0.023 | 0.122±0.010 | 0.164±0.013 |
| 32 | 30.6490 | 77±24     | 0.228±0.118 | 0.169±0.076 | 0.059±0.042 |
| 33 | 31.0815 | 111±14    | 0.170±0.032 | 0.086±0.015 | 0.084±0.017 |
| 34 | 31.5045 | 124±23    | 0.122±0.052 | 0.068±0.021 | 0.053±0.031 |
| 35 | 32.0017 | 69±14     | 0.039±0.017 | 0.020±0.011 | 0.020±0.006 |
| 36 | 32.6583 | 101±26    | 0.077±0.040 | 0.031±0.016 | 0.046±0.024 |
| 37 | 32.8293 | 91±13     | 0.048±0.013 | 0.034±0.008 | 0.014±0.006 |
| 38 | 32.9961 | 175±19    | 0.173±0.022 | 0.070±0.011 | 0.103±0.011 |
| 39 | 33.0929 | 141±19    | 0.078±0.011 | 0.035±0.005 | 0.043±0.006 |
| 40 | 33.2706 | 127±12    | 0.092±0.013 | 0.034±0.004 | 0.058±0.009 |

Column 1 - Number, 2 - Peak MJD, 3 - Amplitude ( $\text{c s}^{-1}$ ), 4 - Duration (d), 5 - Rise Time (d), 6 - Decay Time (d)

Supplement table 1. (Continue)

| No | Date    | Amplitude | Duration    | Rise Time   | Decay Time  |
|----|---------|-----------|-------------|-------------|-------------|
| 41 | 33.5451 | 98±16     | 0.034±0.007 | 0.024±0.003 | 0.010±0.004 |
| 42 | 33.6371 | 92±19     | 0.033±0.011 | 0.020±0.008 | 0.013±0.003 |
| 43 | 33.6623 | 115±19    | 0.021±0.004 | 0.012±0.002 | 0.010±0.002 |
| 44 | 33.6861 | 114±18    | 0.047±0.008 | 0.027±0.004 | 0.019±0.003 |
| 45 | 33.7175 | 126±18    | 0.031±0.007 | 0.019±0.006 | 0.012±0.000 |
| 46 | 33.7604 | 131±18    | 0.039±0.004 | 0.027±0.001 | 0.012±0.003 |
| 47 | 33.8646 | 94±13     | 0.047±0.010 | 0.017±0.006 | 0.030±0.004 |
| 48 | 33.9300 | 100±13    | 0.042±0.009 | 0.012±0.002 | 0.030±0.007 |
| 49 | 33.9926 | 74±13     | 0.027±0.005 | 0.019±0.003 | 0.008±0.002 |
| 50 | 34.3714 | 71±14     | 0.042±0.010 | 0.015±0.006 | 0.027±0.003 |
| 51 | 34.6043 | 158±17    | 0.128±0.006 | 0.077±0.005 | 0.051±0.011 |
| 52 | 34.7221 | 97±13     | 0.044±0.010 | 0.038±0.009 | 0.006±0.002 |
| 53 | 34.7977 | 85±14     | 0.027±0.004 | 0.013±0.003 | 0.014±0.001 |
| 54 | 34.8495 | 136±14    | 0.048±0.001 | 0.026±0.001 | 0.022±0.002 |
| 55 | 34.9490 | 119±15    | 0.122±0.020 | 0.052±0.008 | 0.070±0.012 |
| 56 | 35.1363 | 104±13    | 0.074±0.004 | 0.036±0.004 | 0.037±0.000 |
| 57 | 35.2146 | 103±13    | 0.063±0.009 | 0.030±0.002 | 0.033±0.006 |
| 58 | 35.4176 | 94±14     | 0.042±0.010 | 0.031±0.008 | 0.011±0.002 |
| 59 | 35.5763 | 118±13    | 0.038±0.013 | 0.014±0.004 | 0.024±0.009 |
| 60 | 35.8828 | 290±34    | 0.162±0.028 | 0.059±0.018 | 0.102±0.010 |
| 61 | 36.2247 | 307±26    | 0.147±0.014 | 0.104±0.010 | 0.044±0.003 |
| 62 | 36.4168 | 236±26    | 0.094±0.010 | 0.060±0.006 | 0.034±0.004 |
| 63 | 36.4835 | 248±26    | 0.186±0.016 | 0.041±0.004 | 0.145±0.012 |
| 64 | 36.7104 | 179±26    | 0.087±0.010 | 0.040±0.003 | 0.047±0.007 |
| 65 | 36.8282 | 141±26    | 0.080±0.019 | 0.051±0.012 | 0.029±0.007 |
| 66 | 37.2457 | 122±23    | 0.058±0.010 | 0.047±0.004 | 0.011±0.006 |
| 67 | 37.3888 | 139±25    | 0.074±0.019 | 0.028±0.008 | 0.046±0.010 |
| 68 | 37.5550 | 101±21    | 0.034±0.010 | 0.009±0.006 | 0.025±0.004 |
| 69 | 37.7532 | 110±13    | 0.044±0.007 | 0.035±0.007 | 0.009±0.000 |
| 70 | 37.7859 | 96±13     | 0.034±0.005 | 0.012±0.001 | 0.022±0.004 |
| 71 | 39.2837 | 116±12    | 0.040±0.006 | 0.015±0.002 | 0.024±0.003 |
| 72 | 39.4315 | 156±15    | 0.059±0.004 | 0.030±0.001 | 0.030±0.003 |
| 73 | 39.4771 | 186±15    | 0.058±0.004 | 0.036±0.003 | 0.022±0.001 |
| 74 | 39.5990 | 111±18    | 0.049±0.008 | 0.035±0.005 | 0.014±0.002 |
| 75 | 39.6883 | 73±19     | 0.020±0.007 | 0.004±0.002 | 0.015±0.005 |
| 76 | 40.1623 | 119±18    | 0.114±0.020 | 0.051±0.006 | 0.063±0.015 |
| 77 | 40.4975 | 108±15    | 0.135±0.028 | 0.051±0.011 | 0.084±0.017 |
| 78 | 40.7583 | 70±14     | 0.018±0.005 | 0.009±0.003 | 0.009±0.002 |
| 79 | 40.8040 | 72±15     | 0.024±0.002 | 0.018±0.001 | 0.007±0.001 |
| 80 | 40.8387 | 154±18    | 0.040±0.007 | 0.016±0.003 | 0.024±0.004 |

Supplement table 1. (Continue)

| No  | Date    | Amplitude | Duration    | Rise Time   | Decay Time  |
|-----|---------|-----------|-------------|-------------|-------------|
| 81  | 41.5171 | 159±13    | 0.051±0.005 | 0.022±0.002 | 0.030±0.002 |
| 82  | 41.5716 | 91±13     | 0.023±0.003 | 0.018±0.002 | 0.005±0.002 |
| 83  | 41.6608 | 172±35    | 0.083±0.020 | 0.044±0.012 | 0.039±0.008 |
| 84  | 41.7882 | 213±14    | 0.054±0.004 | 0.024±0.002 | 0.029±0.002 |
| 85  | 41.8590 | 256±14    | 0.061±0.009 | 0.040±0.007 | 0.021±0.002 |
| 86  | 42.0613 | 161±13    | 0.044±0.004 | 0.023±0.004 | 0.021±0.000 |
| 87  | 42.1219 | 177±13    | 0.048±0.000 | 0.032±0.001 | 0.016±0.001 |
| 88  | 42.4720 | 114±14    | 0.039±0.002 | 0.011±0.001 | 0.028±0.001 |
| 89  | 42.5769 | 130±15    | 0.044±0.009 | 0.028±0.004 | 0.016±0.005 |
| 90  | 42.6941 | 124±16    | 0.034±0.003 | 0.014±0.001 | 0.020±0.002 |
| 91  | 42.7636 | 388±33    | 0.048±0.004 | 0.029±0.002 | 0.019±0.002 |
| 92  | 42.7813 | 455±33    | 0.069±0.009 | 0.017±0.001 | 0.052±0.008 |
| 93  | 42.9631 | 192±23    | 0.118±0.014 | 0.038±0.004 | 0.081±0.010 |
| 94  | 43.1218 | 76±17     | 0.063±0.012 | 0.018±0.006 | 0.045±0.007 |
| 95  | 43.2397 | 126±17    | 0.075±0.011 | 0.026±0.005 | 0.049±0.006 |
| 96  | 43.5796 | 137±13    | 0.093±0.013 | 0.058±0.008 | 0.035±0.005 |
| 97  | 44.2791 | 125±12    | 0.053±0.006 | 0.036±0.006 | 0.017±0.000 |
| 98  | 44.3458 | 95±12     | 0.043±0.006 | 0.031±0.004 | 0.011±0.003 |
| 99  | 44.5379 | 103±25    | 0.044±0.011 | 0.024±0.007 | 0.020±0.004 |
| 100 | 44.6925 | 91±13     | 0.034±0.007 | 0.024±0.004 | 0.010±0.002 |
| 101 | 44.8451 | 160±16    | 0.067±0.008 | 0.034±0.005 | 0.033±0.003 |
| 102 | 45.0283 | 213±19    | 0.101±0.016 | 0.070±0.009 | 0.031±0.007 |
| 103 | 45.1584 | 113±18    | 0.043±0.018 | 0.020±0.013 | 0.022±0.004 |
| 104 | 45.3839 | 237±23    | 0.097±0.008 | 0.045±0.003 | 0.052±0.005 |
| 105 | 45.4656 | 380±23    | 0.109±0.002 | 0.043±0.001 | 0.066±0.001 |
| 106 | 45.8940 | 189±19    | 0.079±0.006 | 0.049±0.003 | 0.030±0.003 |
| 107 | 45.9533 | 158±19    | 0.056±0.007 | 0.031±0.004 | 0.025±0.003 |
| 108 | 46.1154 | 190±18    | 0.037±0.005 | 0.025±0.004 | 0.012±0.001 |
| 109 | 46.2414 | 221±15    | 0.053±0.001 | 0.014±0.000 | 0.039±0.000 |
| 110 | 46.4771 | 131±21    | 0.052±0.006 | 0.018±0.001 | 0.034±0.005 |
| 111 | 46.9239 | 186±22    | 0.183±0.026 | 0.070±0.008 | 0.113±0.017 |
| 112 | 47.2290 | 171±18    | 0.029±0.006 | 0.014±0.004 | 0.016±0.002 |
| 113 | 47.3346 | 118±15    | 0.050±0.003 | 0.010±0.002 | 0.039±0.001 |
| 114 | 47.4749 | 80±16     | 0.025±0.008 | 0.014±0.006 | 0.011±0.002 |
| 115 | 47.6330 | 129±21    | 0.032±0.007 | 0.013±0.003 | 0.019±0.003 |
| 116 | 47.7160 | 192±23    | 0.038±0.006 | 0.024±0.004 | 0.014±0.002 |
| 117 | 47.7419 | 175±23    | 0.072±0.010 | 0.035±0.005 | 0.037±0.005 |
| 118 | 47.7835 | 147±23    | 0.040±0.009 | 0.022±0.003 | 0.018±0.006 |
| 119 | 47.9074 | 210±18    | 0.053±0.004 | 0.024±0.002 | 0.028±0.002 |
| 120 | 47.9749 | 140±18    | 0.032±0.005 | 0.016±0.002 | 0.016±0.002 |

Supplement table 1. (Continue)

| No  | Date    | Amplitude | Duration    | Rise Time   | Decay Time  |
|-----|---------|-----------|-------------|-------------|-------------|
| 121 | 48.0355 | 149±18    | 0.049±0.006 | 0.030±0.003 | 0.019±0.003 |
| 122 | 48.2214 | 82±17     | 0.059±0.008 | 0.028±0.005 | 0.031±0.003 |
| 123 | 48.5402 | 85±13     | 0.062±0.011 | 0.035±0.005 | 0.027±0.006 |
| 124 | 49.2615 | 137±16    | 0.146±0.008 | 0.042±0.005 | 0.104±0.004 |
| 125 | 49.5306 | 162±17    | 0.102±0.015 | 0.057±0.007 | 0.045±0.008 |
| 126 | 49.7492 | 109±14    | 0.130±0.013 | 0.038±0.005 | 0.093±0.008 |
| 127 | 49.9624 | 119±15    | 0.159±0.006 | 0.093±0.001 | 0.065±0.005 |
| 128 | 50.1661 | 100±15    | 0.146±0.031 | 0.087±0.017 | 0.058±0.014 |
| 129 | 50.5918 | 88±16     | 0.117±0.027 | 0.062±0.021 | 0.055±0.006 |
| 130 | 50.8411 | 100±13    | 0.157±0.020 | 0.067±0.006 | 0.091±0.014 |
| 131 | 51.4016 | 120±16    | 0.109±0.015 | 0.043±0.008 | 0.066±0.008 |
| 132 | 52.1522 | 125±15    | 0.105±0.016 | 0.034±0.007 | 0.071±0.009 |
| 133 | 52.5371 | 134±18    | 0.121±0.018 | 0.073±0.012 | 0.048±0.006 |
| 134 | 52.6133 | 123±18    | 0.112±0.015 | 0.037±0.005 | 0.075±0.009 |
| 135 | 53.0431 | 129±16    | 0.090±0.010 | 0.040±0.006 | 0.050±0.004 |
| 136 | 53.2638 | 215±16    | 0.158±0.009 | 0.095±0.007 | 0.063±0.002 |
| 137 | 53.6228 | 235±28    | 0.089±0.007 | 0.038±0.003 | 0.051±0.004 |
| 138 | 53.8298 | 118±18    | 0.081±0.013 | 0.030±0.005 | 0.051±0.008 |
| 139 | 53.9136 | 104±18    | 0.078±0.006 | 0.025±0.000 | 0.053±0.006 |
| 140 | 54.1772 | 156±14    | 0.099±0.007 | 0.024±0.003 | 0.076±0.004 |
| 141 | 54.9360 | 170±16    | 0.170±0.010 | 0.078±0.005 | 0.092±0.004 |
| 142 | 55.1928 | 135±14    | 0.115±0.032 | 0.038±0.010 | 0.077±0.022 |
| 143 | 55.5170 | 122±18    | 0.106±0.013 | 0.050±0.008 | 0.056±0.005 |
| 144 | 55.6920 | 205±17    | 0.165±0.015 | 0.052±0.005 | 0.114±0.010 |
| 145 | 55.8432 | 221±17    | 0.205±0.016 | 0.102±0.008 | 0.104±0.008 |
| 146 | 55.9931 | 222±17    | 0.076±0.004 | 0.061±0.003 | 0.015±0.001 |
| 147 | 56.0367 | 227±17    | 0.130±0.010 | 0.071±0.005 | 0.059±0.004 |
| 148 | 56.1211 | 216±17    | 0.161±0.013 | 0.122±0.010 | 0.039±0.003 |
| 149 | 56.3207 | 150±17    | 0.079±0.010 | 0.055±0.007 | 0.024±0.003 |
| 150 | 56.3765 | 164±17    | 0.199±0.014 | 0.054±0.006 | 0.146±0.009 |
| 151 | 56.7662 | 102±14    | 0.169±0.023 | 0.147±0.013 | 0.023±0.010 |
| 152 | 56.9855 | 124±14    | 0.131±0.014 | 0.087±0.009 | 0.045±0.005 |
| 153 | 57.5746 | 103±14    | 0.137±0.024 | 0.067±0.010 | 0.070±0.013 |
| 154 | 58.0909 | 71±12     | 0.144±0.034 | 0.060±0.013 | 0.084±0.022 |
| 155 | 59.0322 | 99±13     | 0.096±0.010 | 0.078±0.009 | 0.018±0.000 |
| 156 | 59.0772 | 111±13    | 0.112±0.022 | 0.019±0.004 | 0.093±0.018 |
| 157 | 59.2849 | 116±13    | 0.171±0.018 | 0.115±0.017 | 0.056±0.000 |
| 158 | 59.4191 | 94±13     | 0.104±0.033 | 0.007±0.016 | 0.097±0.017 |
| 159 | 59.8871 | 166±12    | 0.226±0.020 | 0.144±0.014 | 0.082±0.006 |
| 160 | 60.0137 | 205±12    | 0.270±0.015 | 0.086±0.005 | 0.184±0.010 |

Supplement table 1. (Continue)

| No  | Date    | Amplitude | Duration    | Rise Time   | Decay Time  |
|-----|---------|-----------|-------------|-------------|-------------|
| 161 | 60.2160 | 134±12    | 0.177±0.018 | 0.095±0.008 | 0.083±0.009 |
| 162 | 60.5607 | 113±13    | 0.092±0.017 | 0.043±0.007 | 0.048±0.010 |
| 163 | 60.8897 | 88±12     | 0.158±0.033 | 0.107±0.026 | 0.051±0.008 |
| 164 | 61.1383 | 195±13    | 0.196±0.009 | 0.076±0.003 | 0.119±0.006 |
| 165 | 61.5469 | 124±17    | 0.219±0.028 | 0.138±0.008 | 0.081±0.019 |
| 166 | 62.6388 | 193±23    | 0.192±0.032 | 0.066±0.011 | 0.125±0.021 |
| 167 | 63.0045 | 126±17    | 0.141±0.021 | 0.072±0.016 | 0.069±0.006 |
| 168 | 63.1571 | 189±17    | 0.223±0.003 | 0.068±0.005 | 0.154±0.007 |
| 169 | 63.3805 | 146±17    | 0.125±0.024 | 0.074±0.014 | 0.051±0.010 |
| 170 | 63.4854 | 132±17    | 0.120±0.020 | 0.055±0.007 | 0.066±0.013 |
| 171 | 64.4955 | 111±15    | 0.367±0.074 | 0.079±0.020 | 0.288±0.054 |
| 172 | 67.5347 | 175±22    | 0.241±0.026 | 0.157±0.011 | 0.084±0.015 |
| 173 | 67.9290 | 293±20    | 0.313±0.022 | 0.137±0.010 | 0.176±0.012 |
| 174 | 68.1347 | 204±20    | 0.193±0.019 | 0.096±0.009 | 0.097±0.009 |
| 175 | 68.6238 | 351±20    | 0.306±0.016 | 0.098±0.009 | 0.208±0.007 |
| 176 | 71.0853 | 288±16    | 0.339±0.015 | 0.120±0.006 | 0.219±0.009 |
| 177 | 71.9496 | 188±15    | 0.207±0.021 | 0.107±0.013 | 0.100±0.008 |
| 178 | 72.1070 | 176±15    | 0.231±0.020 | 0.102±0.009 | 0.129±0.012 |
| 179 | 72.3651 | 189±16    | 0.388±0.032 | 0.269±0.021 | 0.119±0.010 |
| 180 | 72.5136 | 191±16    | 0.229±0.019 | 0.066±0.005 | 0.163±0.014 |
| 181 | 72.7595 | 241±16    | 0.408±0.027 | 0.181±0.012 | 0.226±0.015 |
| 182 | 73.1014 | 254±16    | 0.306±0.019 | 0.158±0.010 | 0.148±0.009 |
| 183 | 73.4229 | 295±15    | 0.289±0.016 | 0.238±0.013 | 0.051±0.003 |
| 184 | 73.4856 | 259±15    | 0.316±0.020 | 0.094±0.006 | 0.223±0.015 |
| 185 | 74.0488 | 110±14    | 0.126±0.015 | 0.062±0.007 | 0.064±0.008 |
| 186 | 74.4514 | 93±13     | 0.102±0.017 | 0.030±0.006 | 0.072±0.011 |
| 187 | 74.9990 | 87±13     | 0.185±0.039 | 0.080±0.016 | 0.106±0.023 |
| 188 | 76.0683 | 80±12     | 0.210±0.059 | 0.151±0.046 | 0.059±0.013 |
| 189 | 76.4395 | 75±13     | 0.105±0.031 | 0.063±0.022 | 0.042±0.010 |
| 190 | 77.0226 | 108±12    | 0.102±0.017 | 0.060±0.008 | 0.042±0.008 |
| 191 | 77.1561 | 100±12    | 0.295±0.057 | 0.105±0.032 | 0.190±0.025 |
| 192 | 80.7578 | 109±13    | 0.391±0.112 | 0.232±0.064 | 0.158±0.048 |
| 193 | 85.2674 | 87±13     | 0.497±0.137 | 0.230±0.079 | 0.267±0.058 |
| 194 | 86.1263 | 73±12     | 0.128±0.018 | 0.085±0.017 | 0.042±0.001 |
| 195 | 95.1884 | 95±14     | 0.706±0.317 | 0.275±0.127 | 0.431±0.191 |

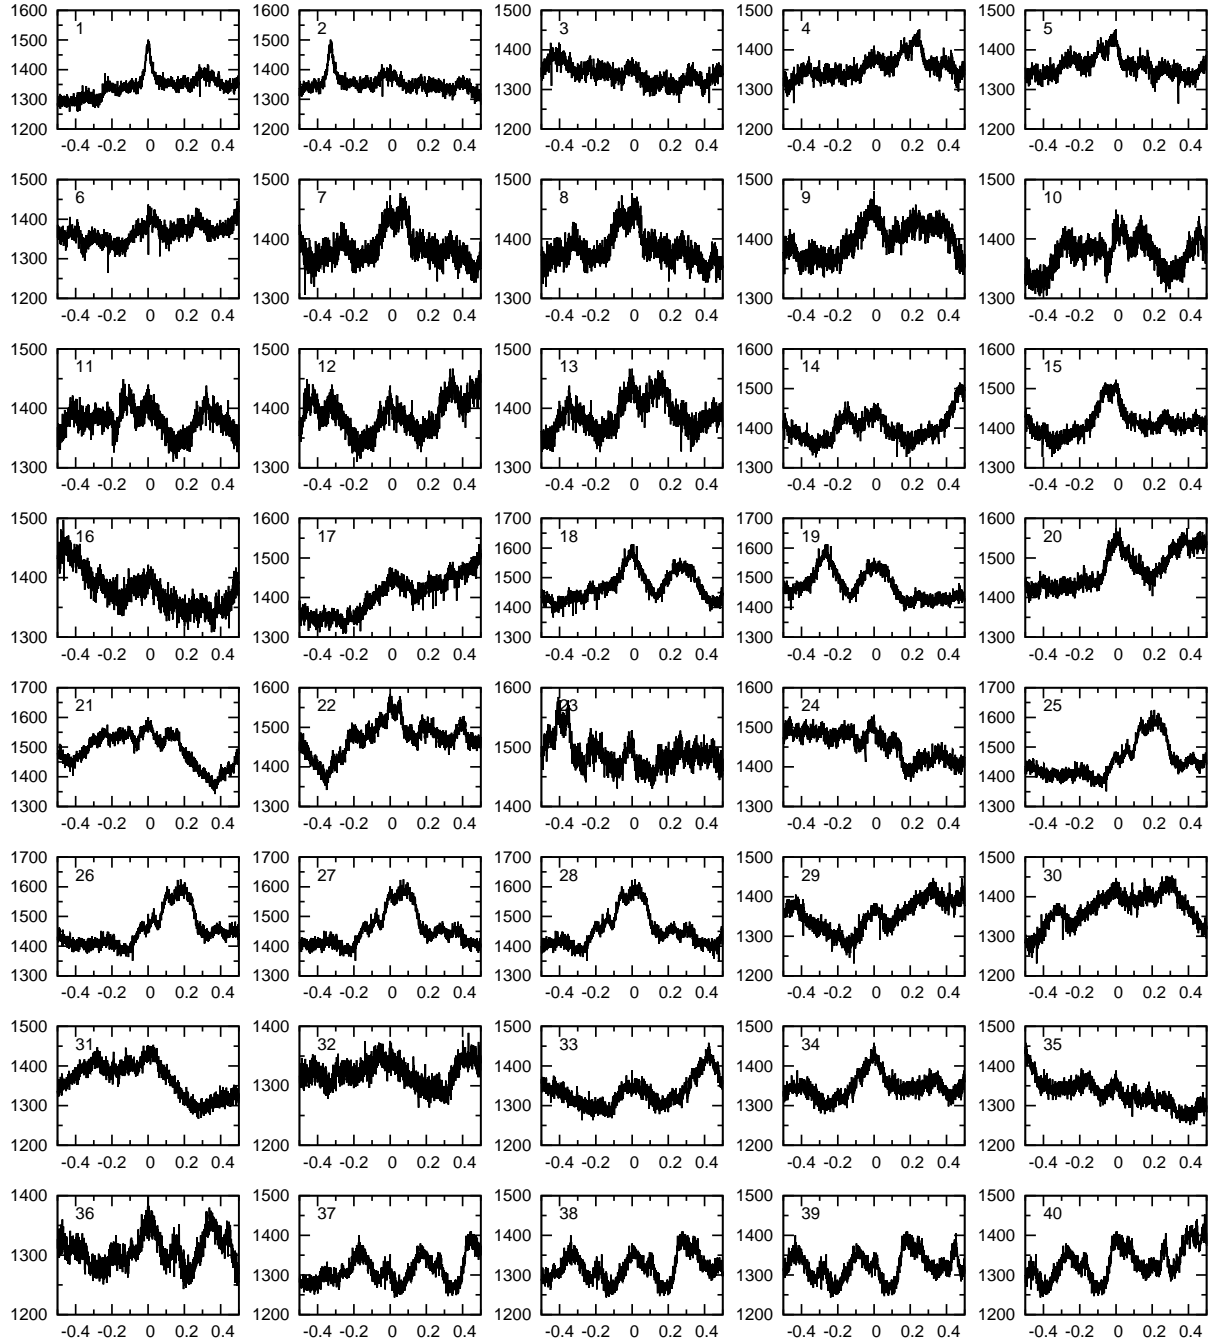

**Supplement figure 1.** Light curve of each detected shot obtained by the *Kepler* spacecraft over the entire Quarter 14 period. The object was monitored for 100 d with 1-minute time resolution. Each shot is numbered at the left top. The number of each shot is listed in supplemental tables.

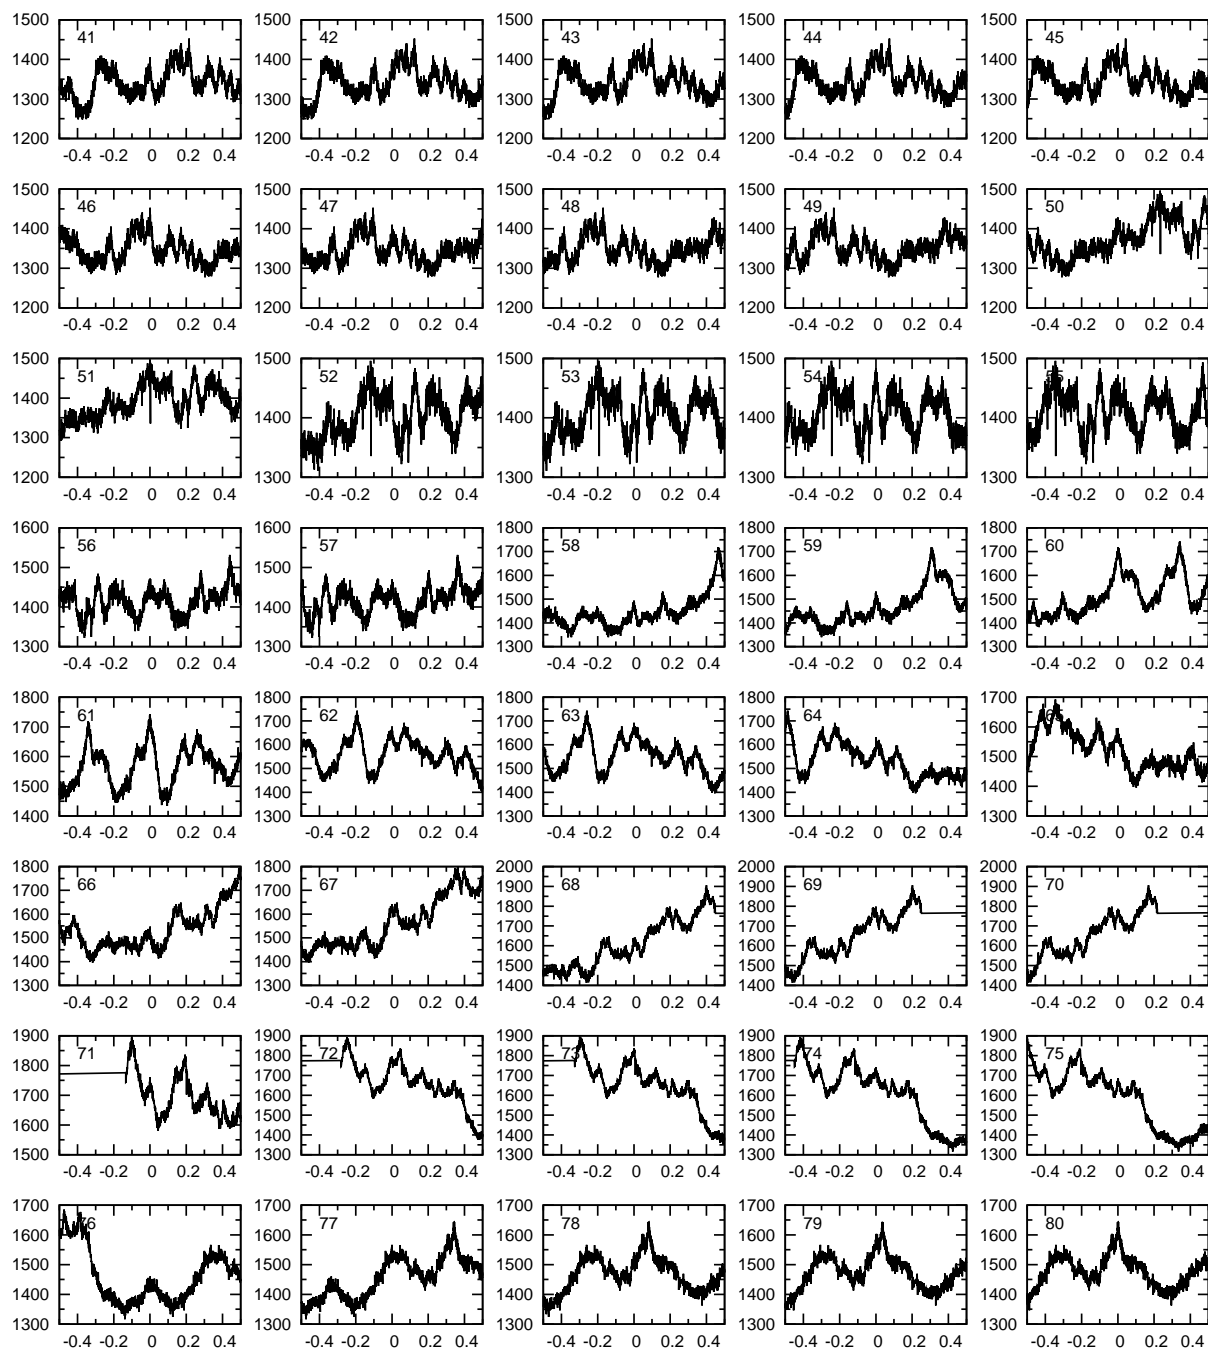

Supplement figure 2. (Continued)



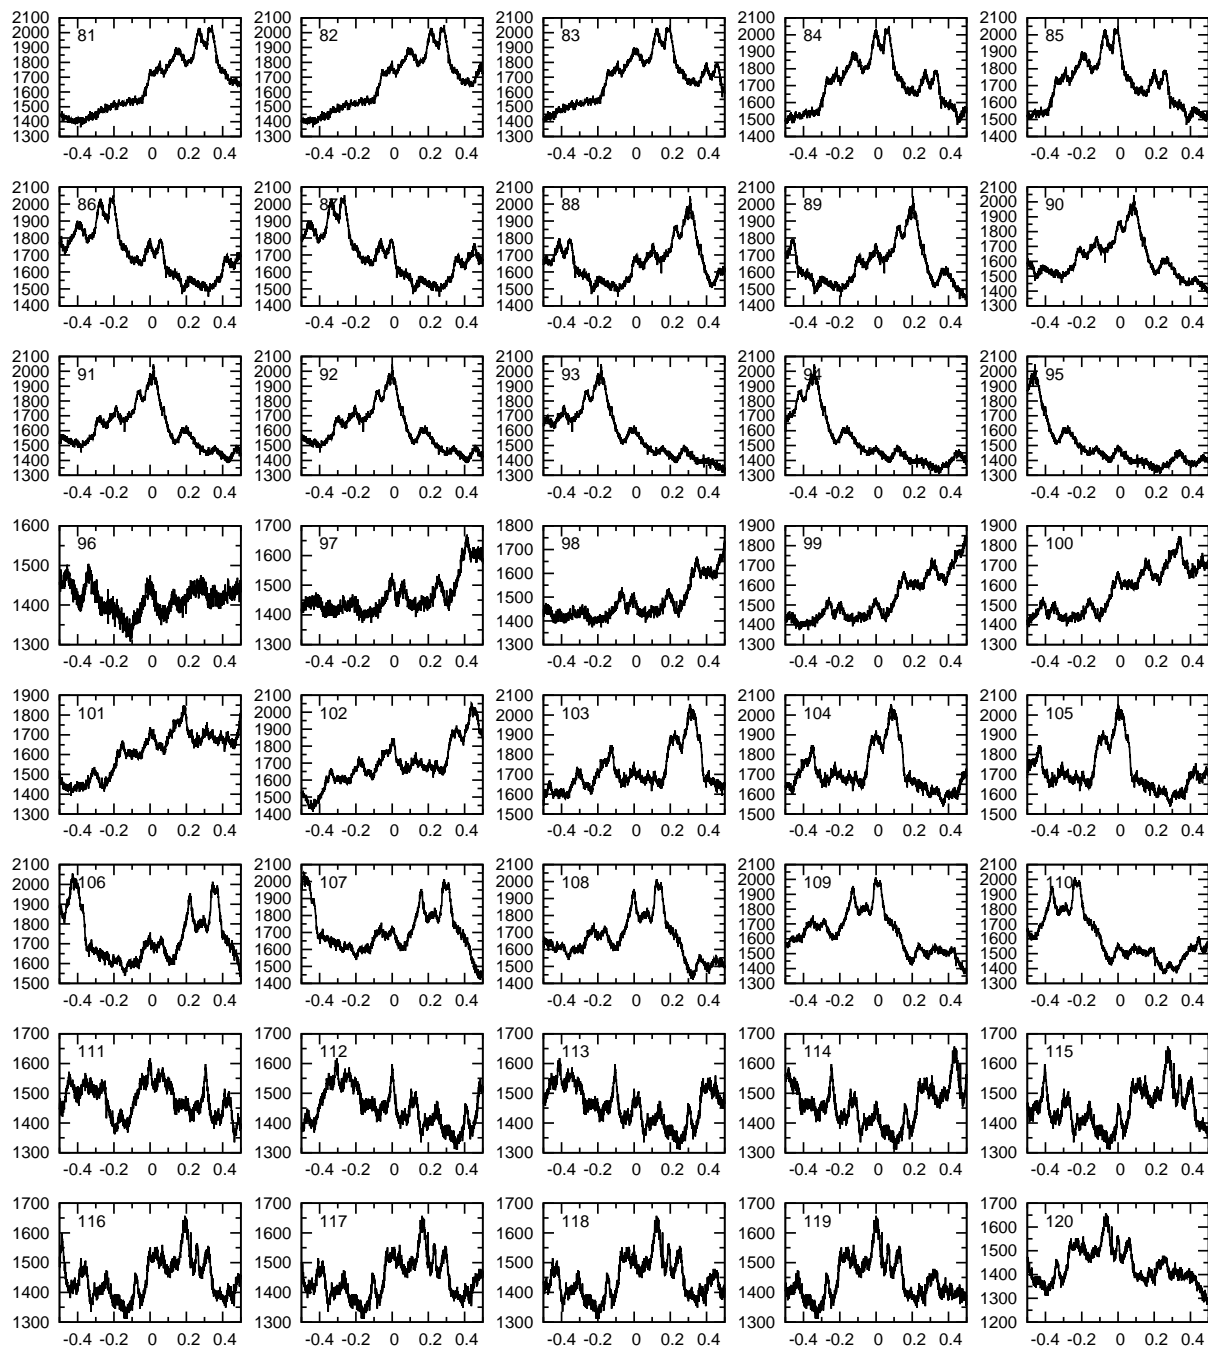

Supplement figure 3. (Continued)

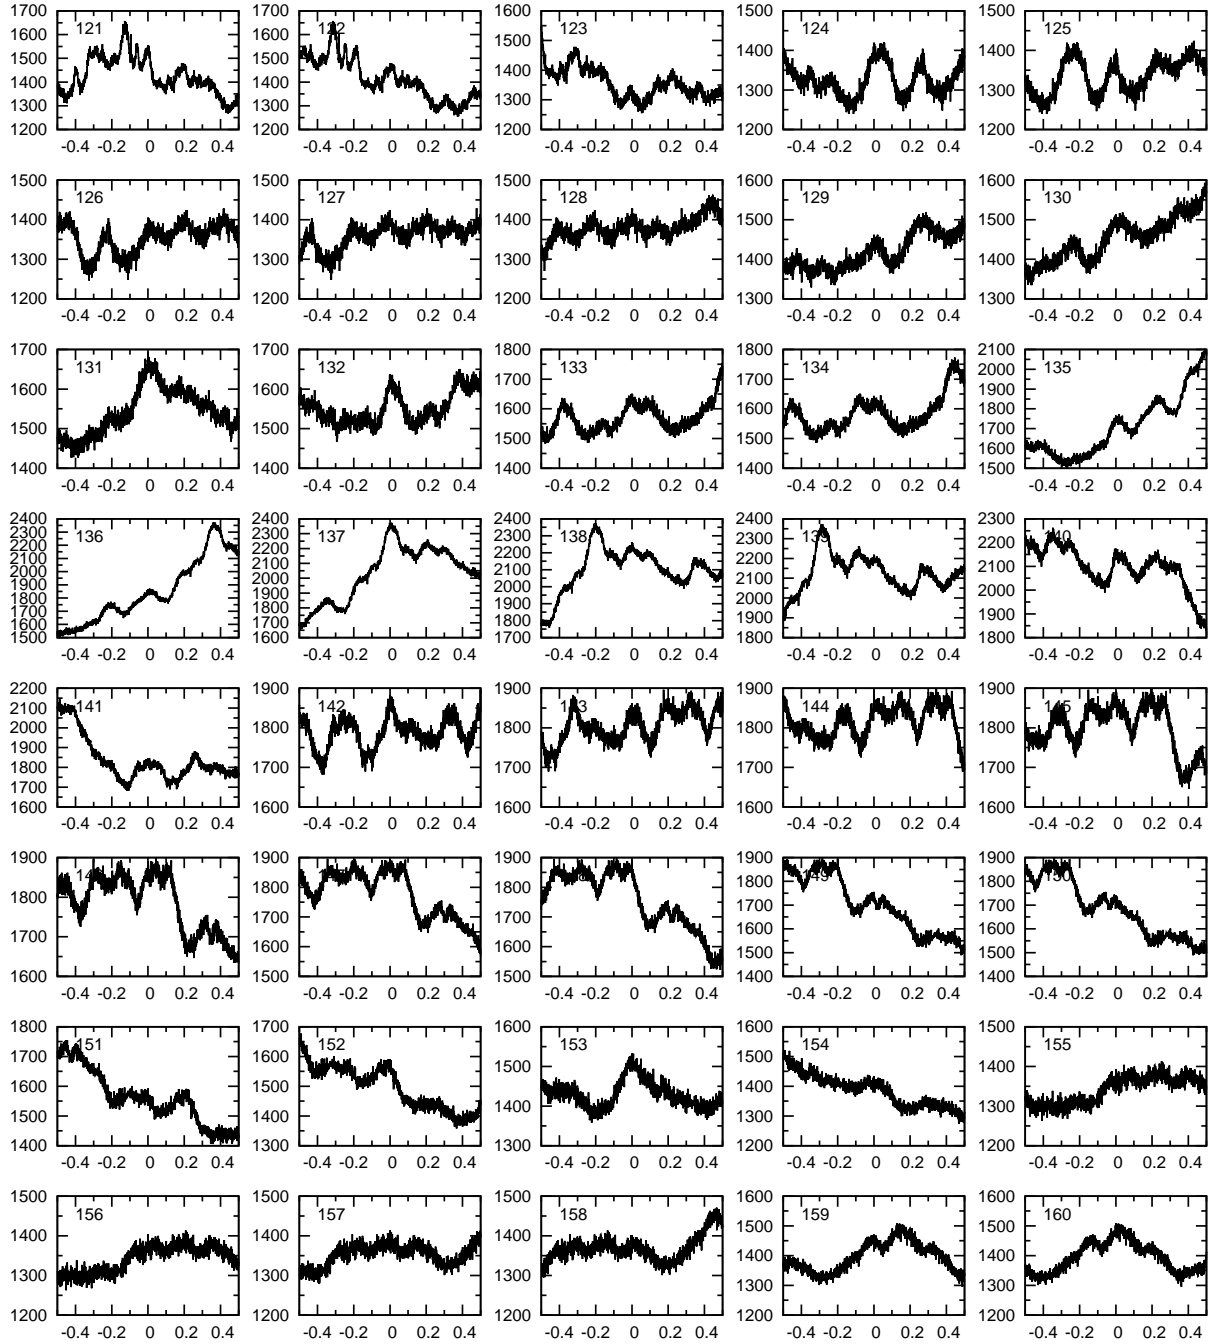

Supplement figure 4. (Continued)

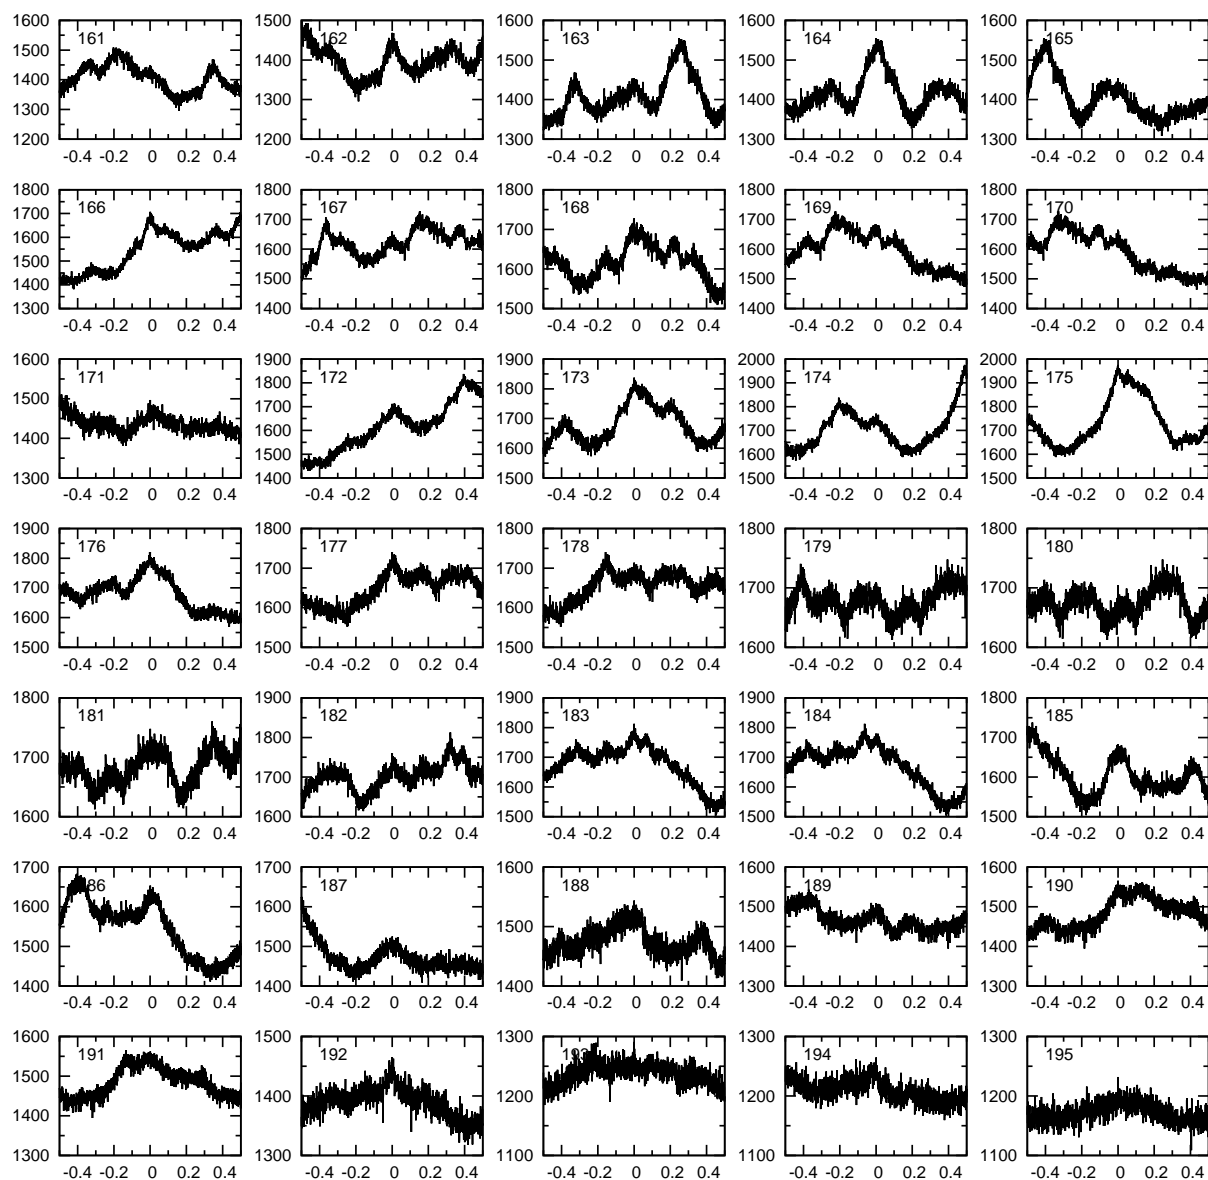

Supplement figure 5. (Continued)
